# Supplementary material
Source: PubMed Central journal article supplement (PMC2713361)
Supplement: NIHMS109923-supplement-1_si_001.pdf [file NIHMS109923-supplement-1_si_001.pdf]

## Supporting Information for

### **Mapping Protein-Protein Interactions by Localized Oxidation: Consequences of the Reach of Hydroxyl Radical<sup>†</sup>**

Sarah M. Cheal, Mindy Ng, Brianda Barrios, Zheng Miao, Amir K. Kalani, and Claude F. Meares\*

Chemistry Department, University of California, Davis, CA 95616

[\\*cfmeares@ucdavis.edu](mailto:cfmeares@ucdavis.edu), phone 530/752-0936, fax 530/752-8938

<sup>†</sup>Supported by NIH Grant GM025909.

#### Table of Contents

|                                                                                              |   |
|----------------------------------------------------------------------------------------------|---|
| Example MS/MS of O-ECAT peptides:.....                                                       | 2 |
| Determination of ratios of (M1)AOD and (M2)AOD tagged peptides using mass spectrometry:..... | 4 |
| Sigma self-oxidation data:.....                                                              | 5 |
| Sigma-RNAP oxidation data:.....                                                              | 7 |

Supporting Information for  
Mapping Protein-Protein Interactions by Localized Oxidation: Consequences of the Reach of  
Hydroxyl Radical.

**Example MS/MS of O-ECAT peptides:**

Both side chain carbonyl tagging (Figure s1) and N-terminal carbonyl tagging (Figure s2) were observed.

(R)IRQEAK

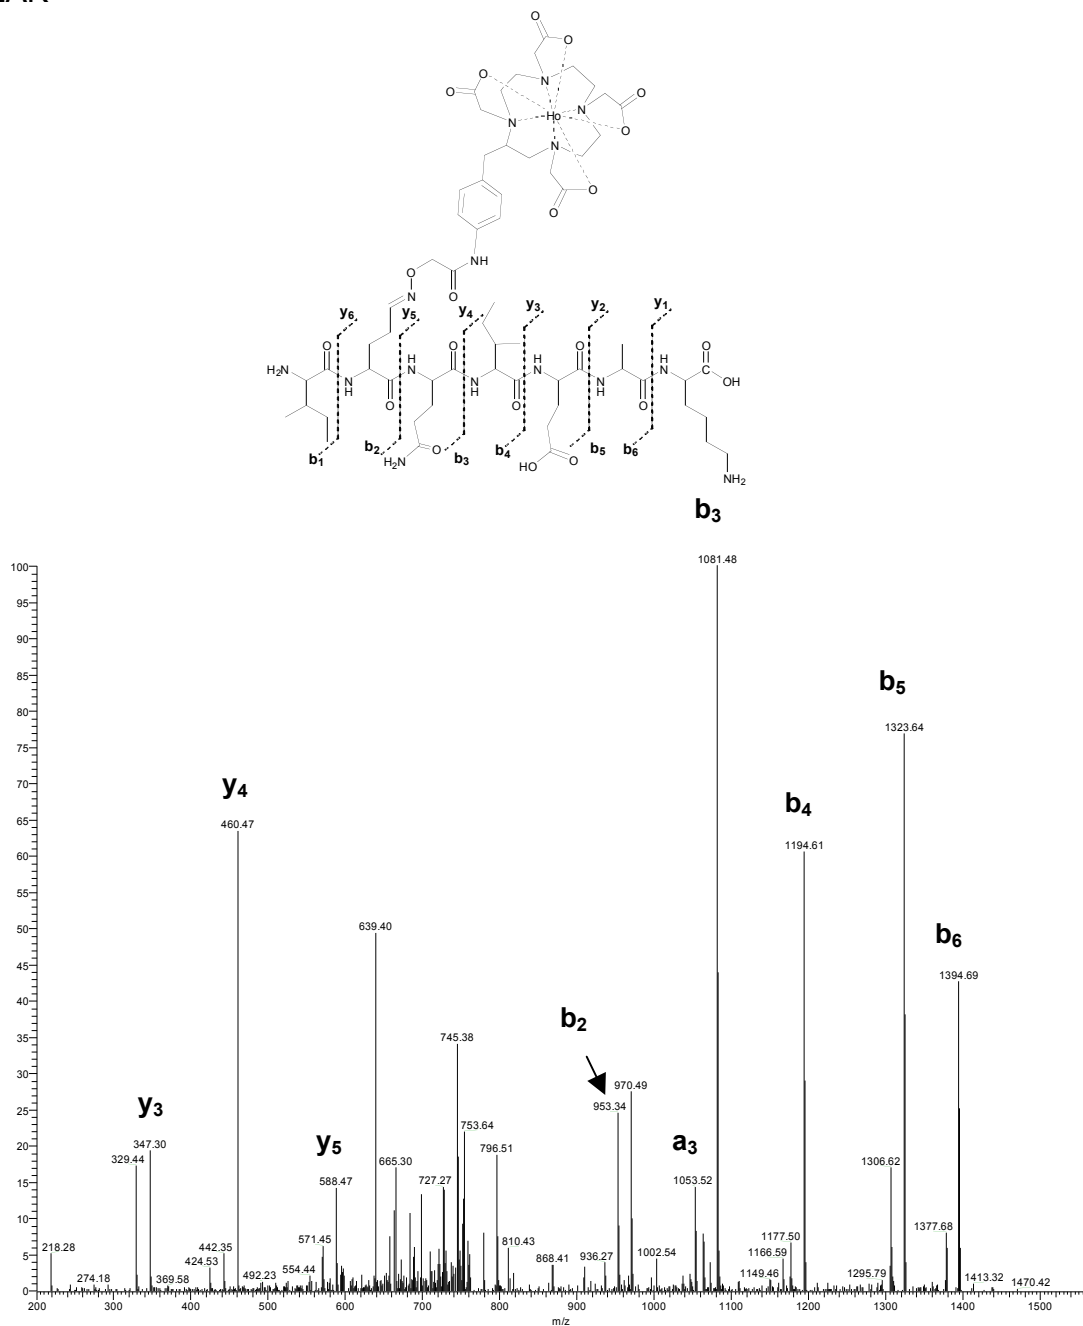

Figure s1. MS/MS spectrum of a side chain O-ECAT tagged peptide. The side chain of arginine is oxidized to a carbonyl and subsequently tagged with O-ECAT.

Supporting Information for  
Mapping Protein-Protein Interactions by Localized Oxidation: Consequences of the Reach of  
Hydroxyl Radical.

RS\*HATAQEEILK

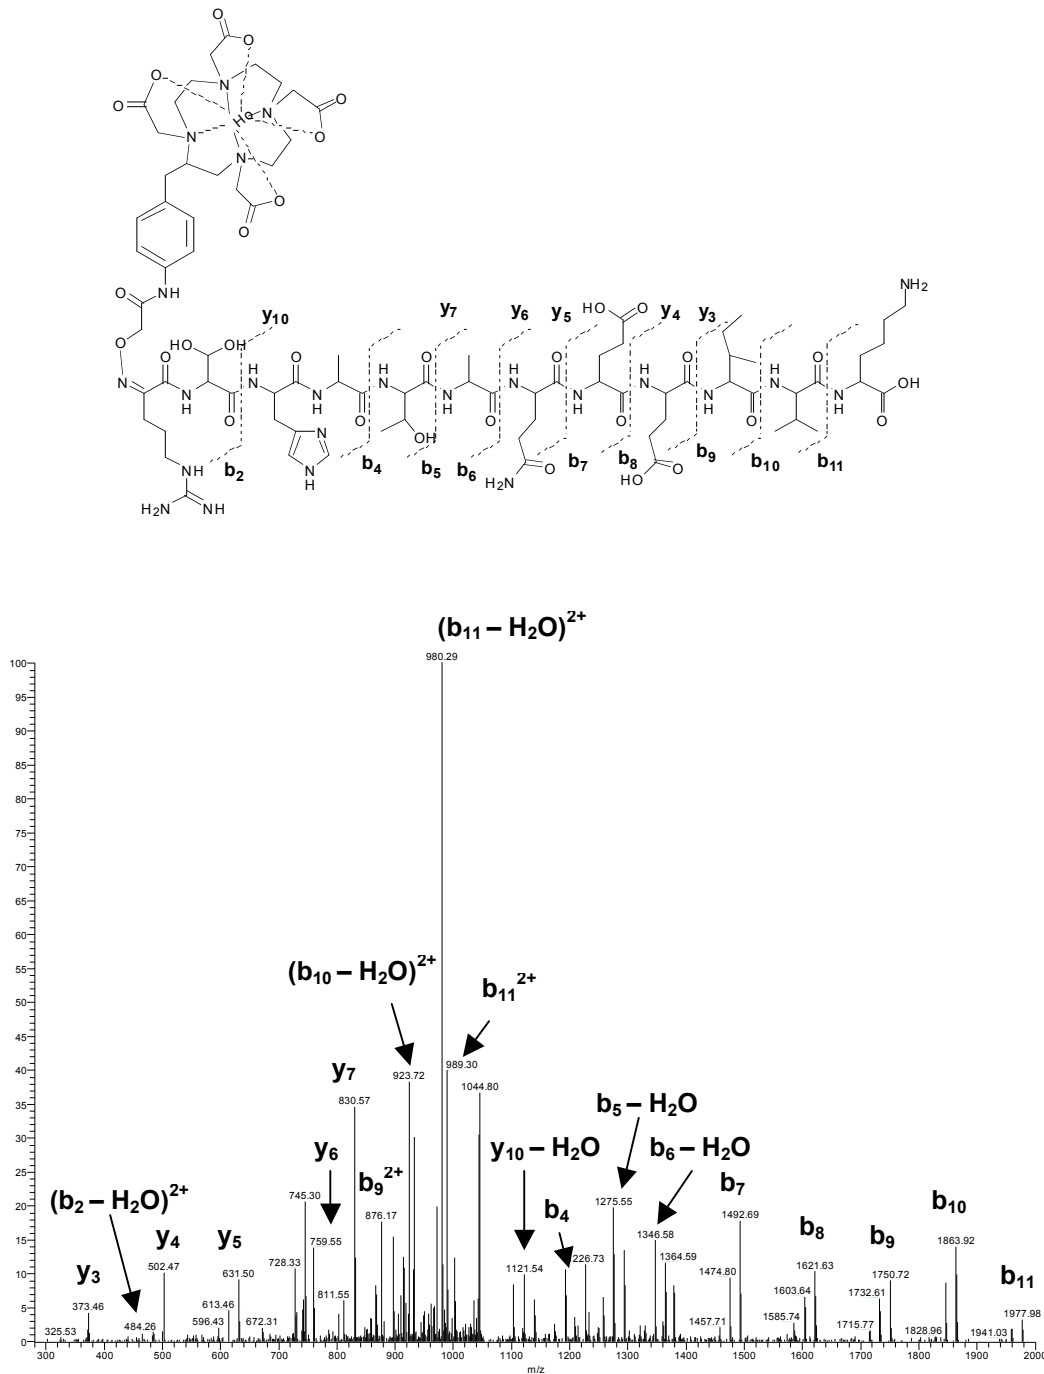

Figure s2. MS/MS spectrum of a N-terminal O-ECAT tagged peptide. The peptide backbone was cleaved by a hydroxyl radical, resulting in a N-terminal  $\alpha$ -ketoacyl derivative. This carbonyl was tagged by O-ECAT.

**Determination of ratios of (M1)AOD and (M2)AOD tagged peptides using mass spectrometry:**

A FeBABE/ascorbate (final 1 mM)/hydrogen peroxide (final 10 mM) oxidized 376C sample was tagged with equimolar PrAOD and HoAOD and the identified oxidized and tagged peptides were quantitated as a control.

**Table s1.** Oxidized peptides labeled with MAOD identified on FeBABE  $\sigma^{70}$  376 C following treatment with ascorbate and hydrogen peroxide. The sequence of the identified peptide, along with the preceding amino acid residue, is listed with the oxidized, tagged residue indicated in bold. Any other oxidative modifications (e.g. +16amu, +32amu) are indicated with an asterisk. During this experiment the oxidized protein was tagged with equimolar HoAOD and PrAOD so the theoretical HoAOD/PrAOD ratio was 1.

| Sequence               | Modified AA | HoAOD intensity | PrAOD intensity | HoAOD/PrAOD |
|------------------------|-------------|-----------------|-----------------|-------------|
| (K)LLV <b>TR</b> GK    | R15         | 2.67E3          | 2.07E3          | 1.3         |
| (K)FAEL <b>RA</b> Q    | R226        | 1.18E3          | 1.34E3          | 0.9         |
| (R)V <b>RT</b> QER     | R281        | 1.43E4          | 1.54E4          | 0.9         |
| (R)SIAD <b>QA</b> RTIR | R448        | 1.23E3          | 1.30E3          | 1.0         |
| (R)E <b>PT</b> PEELAER | P480        | 1.67E3          | 1.61E3          | 1.0         |
| (K)QFDV <b>TR</b> ER   | R584        | 4.88E2          | 4.60E2          | 1.1         |
| (R)I <b>R</b> QEAK     | R588        | 5.98E3          | 5.61E3          | 1.1         |

Supporting Information for  
Mapping Protein-Protein Interactions by Localized Oxidation: Consequences of the Reach of  
Hydroxyl Radical.

**Sigma self-oxidation data:**

Table s2. Summary of all  $\sigma^{70}$  self-oxidation data. The sequence of the identified peptide, along with the preceding amino acid residue, is listed with the oxidized, tagged residue indicated in bold. Any other oxidative modifications (e.g. +16amu, +32amu) are indicated with an asterisk. A comparison of intensities of PrAOD tagged peptides from FeEDTA and HoAOD tagged peptides from FeBABE conjugates is included. If the oxidized residue was identified using a 2IT FeBABE Sigma library a “Y” is indicated.

| Cys mutant     | Sequence            | Modified AA   | Distance from Cys (Å)* | Intensity ratio FeBABE/FeEDTA | 2IT FeBABE Sigma** |
|----------------|---------------------|---------------|------------------------|-------------------------------|--------------------|
| 132C           | -.M*EQNPQSQLK       | P5            |                        | 8.1                           | Y                  |
|                | -.MEQNPQSQLK        | P5            |                        |                               | Y                  |
|                | (R)EGEIDIAKR        | K121          | 16.4                   |                               |                    |
|                | (Y)LLEQYDRVEAEEAR   | R150          | 24.5                   |                               | Y                  |
|                | (R)EKFAELR          | E219          | 23.1                   | 7.1                           | Y                  |
|                | (R)AQYVVTRDTIK      | R232          | 19.9                   |                               |                    |
|                | (K)LHDVSEEVHRALQK   | R339          | 32.7                   |                               | Y                  |
|                | (R)MS*IGEAKAR       | K371          | 14.1                   |                               | Y                  |
|                | (K)AVDKFEYR         | A415          | 23.9                   | 2.5                           | Y                  |
|                | (K)AVDKFEYR         | K418          | 11.1                   |                               |                    |
|                | (K)AVDKFEYRR        | R422          | 20.5                   |                               |                    |
|                | (R)QAITRSIADQAR     | R441          | 36.8                   |                               | Y                  |
|                | (R)EPTPEELAER       | P478          |                        | 13.2                          | Y                  |
|                | (R)M*LMPEDKIR       | K493          |                        |                               | Y                  |
|                | (R)AATHDVLAGLTAREAK | R554          |                        |                               | Y                  |
|                | (K)QFDVTRER         | R584          |                        |                               |                    |
|                | (R)IRQIEAK          | R588          |                        | 29.3                          | Y                  |
|                | (R)QIEAKALR         | K593          |                        |                               |                    |
|                | 376C                | -.M*EQNPQSQLK | P5                     |                               | 1.4                |
| -.MEQNPQSQLK   |                     | P5            |                        | 2.1                           | Y                  |
| -.ME*QNPQSQLKL |                     | P5            |                        |                               | Y                  |
| (V)LSSVESEIGRT |                     | R93           |                        |                               |                    |
| (R)EGEIDIAKR   |                     | K121          | 10.7                   |                               |                    |
| (R)EGEIDIAKR*  |                     | K121          | 10.7                   | 2.0                           |                    |
| (R)EKFAELR     |                     | E219          | 35.9                   |                               | Y                  |
| (R)EKFAELR     |                     | K220          | 32.6                   |                               | Y                  |
| (R)AQYVVTRDTIK |                     | R232          | 38.4                   |                               |                    |

Table s2 is continued on next page.

Supporting Information for  
Mapping Protein-Protein Interactions by Localized Oxidation: Consequences of the Reach of  
Hydroxyl Radical.

Table s2, continued.

| Cys mutant       | Sequence            | Modified AA | Distance from Cys (Å)* | Intensity ratio FeBABE/FeEDTA | 2IT FeBABE Sigma** |
|------------------|---------------------|-------------|------------------------|-------------------------------|--------------------|
| 376C             | (G)RS*HATAQEEILK    | R240        | 39.2(H242)             |                               |                    |
|                  | (A)TAQEEILK         | E247        | 34.5                   | 0.23                          |                    |
|                  | (K)QFRLVPK          | R260        | 21.1                   | 2.0                           |                    |
|                  | (K)LSVEQSKM*PK      | K296        | 45.1                   |                               | Y                  |
|                  | (M)NKPWSEK          | N323        | 54.2                   | 0.74                          | Y                  |
|                  | (M)NKPWSEK          | K324        | 52.8                   |                               |                    |
|                  | (K)LHDVSEEVHRALQK   | R339        | 42.1                   |                               |                    |
|                  | (R)MS*IGEAKAR       | K371        | 8.61                   |                               | Y                  |
|                  | (K)AVDKFEYR         | A415        | 10.0                   |                               | Y                  |
|                  | (K)AVDKFEYRR        | R422        | 16.8                   |                               |                    |
|                  | (R)QAITRSIADQAR     | R441        | 23.6                   |                               |                    |
|                  | (G)REPTPEELAER      | R476        |                        |                               |                    |
|                  | (R)EPTPEELAER       | E477        |                        |                               | Y                  |
|                  | (R)EPTPEELAER       | P478        |                        | 12.1(+3), 12.6 (+2)           | Y                  |
|                  | (R)EPTPEELAER       | T479        |                        |                               |                    |
|                  | (R)EPTPEELAER       | P480        |                        | 12.6                          |                    |
|                  | (R)KVLKI*AK         | K496        |                        |                               | Y                  |
|                  | (R)AATHDVLAGLTAREAK | R554        |                        |                               | Y                  |
|                  | (R)IRQIEAK          | R588        |                        | 2.4                           | Y                  |
|                  | 422C                | (R)QIEAKALR | K593                   |                               |                    |
| -.M*EQNPQSQLK    |                     | P5          |                        | 9.8(+3), 9.3(+2)              | Y                  |
| -.MEQNPQSQLK     |                     | P5          |                        | 0.64(+3), 0.75(+3)            | Y                  |
| (R)EGEIDIKR      |                     | E114        | 13.7                   | 0.4                           |                    |
| (R)EGEIDIKR      |                     | K121        | 9.5                    | 2.6                           |                    |
| (R)EKFAELR       |                     | E219        | 28.8                   |                               | Y                  |
| (R)EKFAELR       |                     | K220        | 25.7                   | 2.6                           | Y                  |
| (R)AQYVVTRDTIK   |                     | R232        | 37.8                   |                               |                    |
| (G)RS*HATAQEEILK |                     | R240        | 39.2(H242)             | 3.5                           |                    |
| (K)LSVEQSKM*PK   |                     | K296        | 58.0                   |                               | Y                  |
| (R)MSI*GEAKAR    |                     | K371        | 19.4                   |                               | Y                  |
| (R)MS*IGEAKAR    |                     | K371        | 19.4                   |                               | Y                  |
| (R)QAITRSIADQAR  |                     | R441        | 28.6                   |                               | Y                  |
| (R)SIADQARTIR    |                     | R448        |                        |                               |                    |
| (R)EPTPEELAER    |                     | E477        |                        |                               | Y                  |
| (R)EPTPEELAER    |                     | P478        |                        | 5.4                           | Y                  |
| (R)EPTPEELAER    |                     | P480        |                        | 5.4                           |                    |
| (R)EPTPEELAER    |                     | E482        |                        | 2.8                           |                    |
| (K)QFDVTRER      |                     | R584        |                        | 7.0                           |                    |
| (R)IRQIEAK       |                     | R588        |                        |                               | Y                  |

\* Distance from the  $\alpha$ -carbon of the Cys residue to the  $\alpha$ -carbon of the oxidized and tagged amino acid residue.

\*\*The oxidized residues found using the 2IT FeBABE library not found during studies with single cys Sigma mutants: R15, A248, R274, R279.

Supporting Information for  
Mapping Protein-Protein Interactions by Localized Oxidation: Consequences of the Reach of  
Hydroxyl Radical.

**Sigma-RNAP oxidation data:**

Table s3. Inferred distances from the  $\alpha$  carbon of the  $\sigma 70$  cysteine to which FeBABE was attached, to the  $\alpha$  carbon of each oxidized and tagged amino-acid residue on the E. coli RNAP core enzyme. These data were determined using the crystal structure of Taq RNAP holoenzyme (pdb file 1L9U) and sequence homology.

| Single-Cys $\sigma^{70}$ | RNAP subunit | Identified E.coli AA | T.aquaticus Sequence # | Inferred Distance to Single Cys (Å) |       |      |
|--------------------------|--------------|----------------------|------------------------|-------------------------------------|-------|------|
| 376C                     | $\beta$      | 1163T                | 986V                   | 110.5                               |       |      |
| 396C                     | $\beta'$     | 41P                  | 29P                    | 13.9                                |       |      |
| 517C                     | $\beta'$     | 2K                   | 2K                     | 23.2                                |       |      |
|                          |              | 27P                  | 14P                    | 33.1                                |       |      |
|                          |              | 41P                  | 29P                    | 25.9                                |       |      |
|                          |              | 47R                  | 35R                    | 25.5                                |       |      |
|                          |              | 339R                 | 628R                   | 23.2                                |       |      |
|                          |              | 392R                 | 671K                   | 35.4                                |       |      |
|                          |              | 1188E                | 1 aa gap; (1305K)      | 57.8                                |       |      |
|                          |              | 191K                 | 179S                   | 50.6                                |       |      |
|                          |              | 233R                 | >10 aa gap; (207L)     | N/A                                 |       |      |
|                          |              | 470R                 | 350R                   | 32.2                                |       |      |
| 517C                     | $\beta$      | 530R                 | 420R                   | 22.4                                |       |      |
|                          |              | 1044P                | 817P                   | 25.3                                |       |      |
|                          |              | 1065K                | 837K                   | 32.9                                |       |      |
|                          |              | 1323F                | 1085F                  | 16.9                                |       |      |
|                          |              | 581C                 | $\beta'$               | 27P                                 | 14P   | 63.8 |
|                          |              | 41P                  | 29P                    | 58.4                                |       |      |
|                          |              | 47R                  | 35R                    | 56.2                                |       |      |
| 581C                     | $\beta'$     | 270R                 | 545R                   | 63.2                                |       |      |
|                          |              | 282L                 | 557L                   | 72.0                                |       |      |
|                          |              | 581C                 | $\beta$                | 1241D                               | 1003D | 66.8 |
